# Supplementary material for: The BCO2 Genotype and the Expression of BCO1, BCO2, LRAT, and TTPA Genes in the Adipose Tissue and Brain of Rabbits Fed a Diet with Marigold Flower Extract
Source: MDPI journal article supplement (doi:10.3390/ijms24032304), 2023-01-24
Supplement: s1 [file s1]

**Table S1.** Ingredients, chemical composition and energy content of the control diet.

| Ingredients (%)                     |      | Chemical composition and energy content |       |
|-------------------------------------|------|-----------------------------------------|-------|
| Dried alfalfa                       | 33.5 | Dry matter (%)                          | 89.15 |
| Oat                                 | 17   | Crude protein (%)                       | 16.68 |
| Wheat bran                          | 15   | Ether extract (%)                       | 3.20  |
| Barley                              | 12.3 | Crude ash (%)                           | 6.74  |
| Wheat                               | 9    | Neutral detergent fiber (%)             | 26.63 |
| Soyabean meal                       | 8    | Acid detergent fiber (%)                | 18.57 |
| Linseed                             | 2    | Gross energy (MJ/kg)                    | 17.65 |
| Mineral supplements <sup>a</sup>    | 1.8  | Lutein (mg/kg)                          | 21.64 |
| Mineral–vitamin premix <sup>b</sup> | 1    | Zeaxanthin (mg/kg)                      | 0.14  |
| NaCl                                | 0.4  | β-carotene (mg/kg)                      | 9.97  |
| Total                               | 100  | Retinol (IU/kg)                         | 9734  |
|                                     |      | α-tocopherol (mg/kg)                    | 20.71 |

<sup>a</sup>Mineral supplements: Calcium carbonate, dicalcium phosphate, sodium hydrogen carbonate.

<sup>b</sup>Mineral–vitamin premix (1 kg): vitamin A: 3500000 IU, vitamin D<sub>3</sub>: 200000 IU, vitamin E: 28000 mg, vitamin K<sub>3</sub>: 200 mg, vitamin B<sub>1</sub>: 1500 mg, vitamin B<sub>2</sub>: 2800 mg, vitamin B<sub>6</sub>: 2800 mg, vitamin B<sub>12</sub>: 20000 mcg, folic acid: 200 mg, niacin: 10000 mg, biotin: 200000 mcg, calcium pantothenate: 7000 mg, choline: 30000 mg, Fe: 17000 mg, Zn: 2000 mg, Mn: 1000 mg, Cu (copper sulphate x 5H<sub>2</sub>O. 24.5%): 800 mg, Co: 1000 mg, I: 100 mg, methionine: 150 g, Ca: 150 g, P: 100 g.

**Table S2.** RT-qPCR primers.

| Gene           | Sequence (5′–3′)                                     | Annealing temperature | Product length | Amplification efficiency |
|----------------|------------------------------------------------------|-----------------------|----------------|--------------------------|
| <i>β-actin</i> | F: CTCCCTGGAGAAGAGCTACG<br>R: TTGAAGGTGGTCTCGTGGAT   | 59.18°C<br>60.51°C    | 138 bp         | 104%                     |
| <i>GAPDH</i>   | F: TCGGAGTGAACGGATTTGGC<br>R: GCCGTGGGTGGAATCATACT   | 60.67°C<br>59.82°C    | 146 bp         | 105%                     |
| <i>BCO1</i>    | F: ACGCGACCTCAGAGACAAAT<br>R: TGAAAACGTTTCCAGCAGCG   | 59.40°C<br>59.97°C    | 141 bp         | 102%                     |
| <i>BCO2</i>    | F: GGCTGTGGTTTTTCGGCATT<br>R: GCTCCTGGTACTGGCACA AAA | 59.97°C<br>60.25°C    | 128 bp         | 89%                      |
| <i>LRAT</i>    | F: ATGGGCCTGGCATCCTATAC<br>R: CACAGTTGACGTGGGGAAAG   | 59.00°C<br>59.06°C    | 93 bp          | 115%                     |
| <i>TTPA</i>    | F: CCCAGACATTCTTCCTCTGG<br>R: ATGAATGGGCTCAGAAATGC   | 59.65°C<br>60.04°C    | 124 bp         | 113%                     |

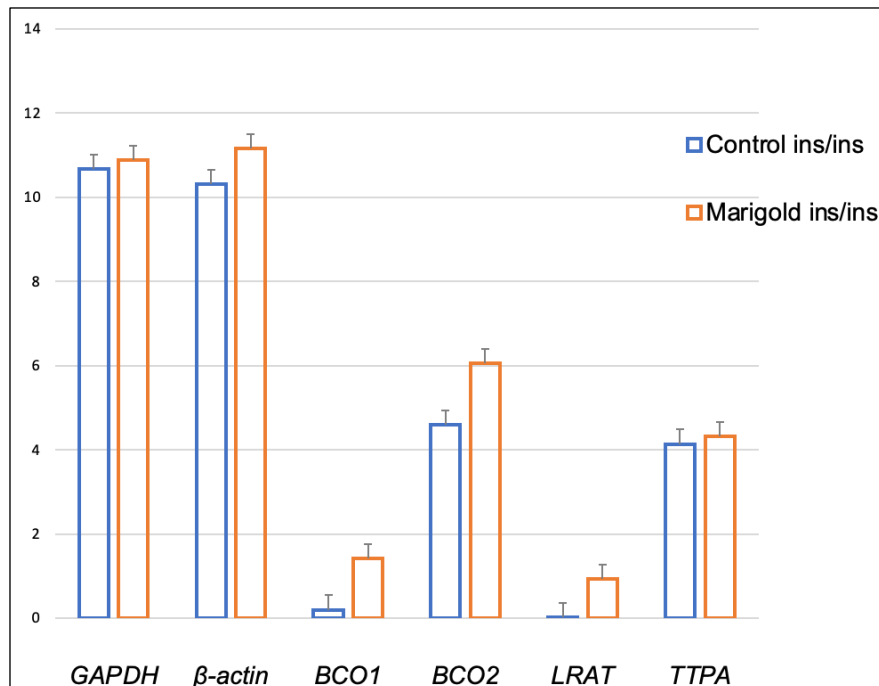

**Figure S1.** Relative *BCO1*, *BCO2*, *LRAT* and *TTPA* mRNA levels (log<sub>2</sub> abundance) in the perirenal fat of rabbits fed different diets (control diet vs. diet with the addition of Aztec marigold flower extract) having ins/ins genotype at codon 248 of the *BCO2* gene. *GAPDH* and *β-actin* were used as reference genes. Data represent the posterior means (expressed as arbitrary units)  $\pm$  SEM (standard error of the mean). No statistically significant differences were noted.

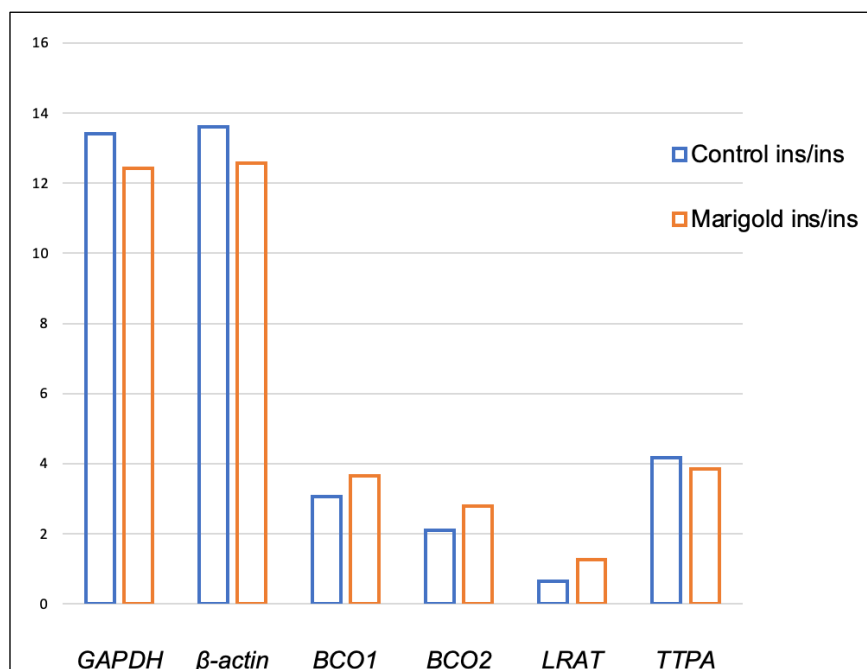

**Figure S2.** Relative *BCO1*, *BCO2*, *LRAT* and *TTPA* mRNA levels (log<sub>2</sub> abundance) in the brain of rabbits fed different diets (control diet vs. diet with the addition of Aztec marigold flower extract) having ins/ins genotype at codon 248 of the *BCO2* gene. *GAPDH* and *β-actin* were used as reference genes. Data represent the posterior means (expressed as arbitrary units)  $\pm$  SEM (standard error of the mean). No statistically significant differences were noted.
